# Supplementary material
Source: PubMed Central journal article supplement (PMC4065155)

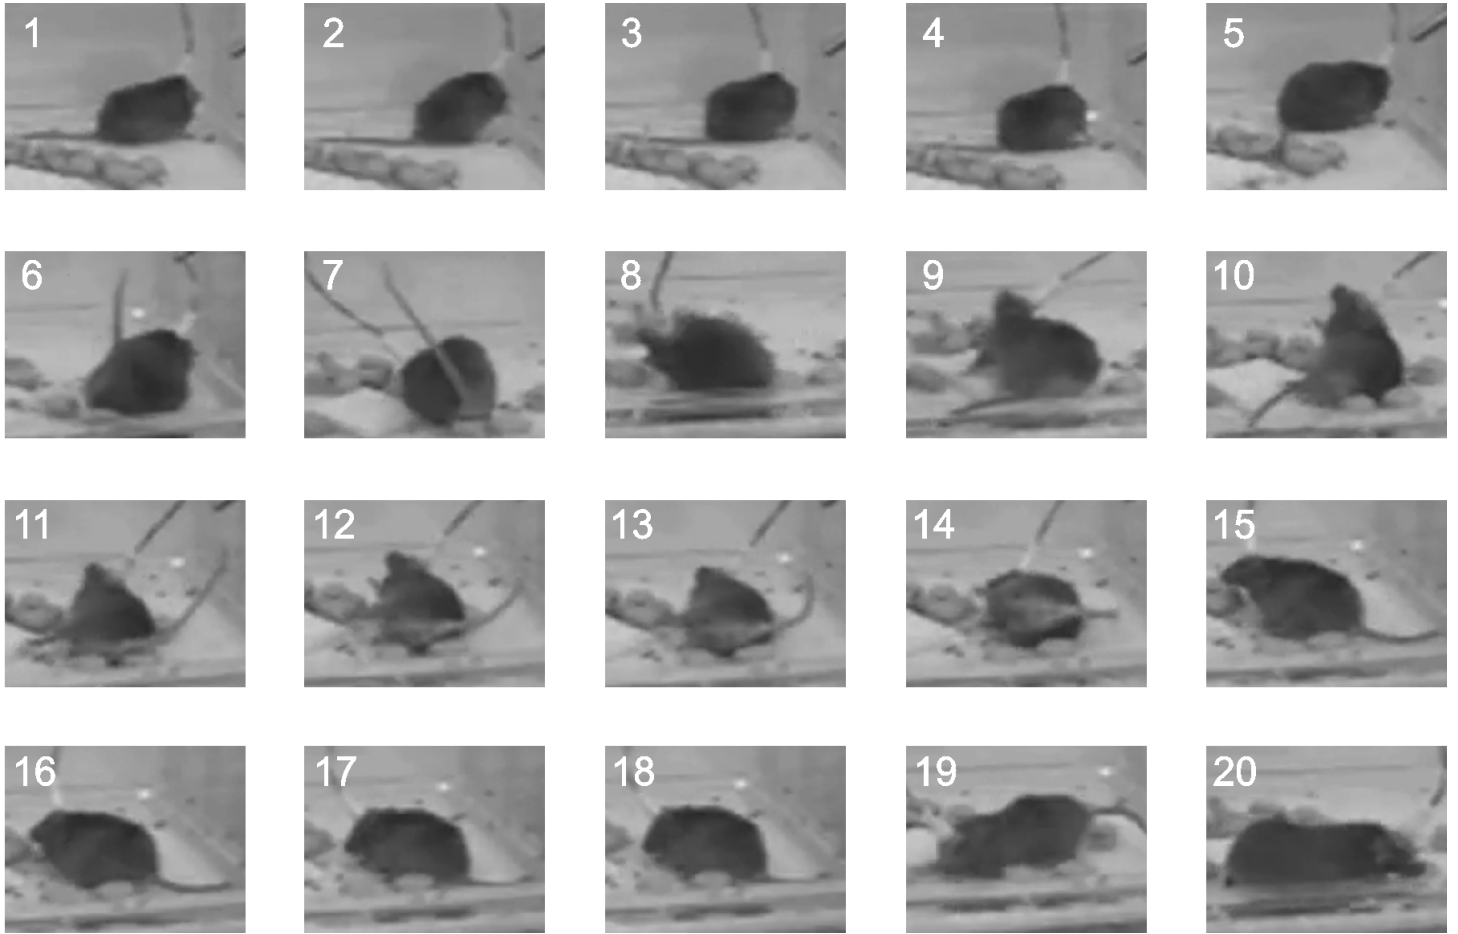

Fig. S1

Supplement: supp_ddu095_ddu095supp_fig1.pdf [file supp_ddu095_ddu095supp_fig1.pdf]
